# Supplementary material for: Genetic diversity and symbiotic effectiveness of Phaseolus vulgaris-nodulating rhizobia in Kenya
Source: PubMed Central journal article supplement (PMC6052332; doi:10.1016/j.syapm.2018.02.001), 2018-07
Supplement: mmc1.pdf [file mmc1.pdf]

Systematic and Applied Microbiology

Supplementary data for:

Genetic diversity and symbiotic effectiveness of *Phaseolus vulgaris*-  
nodulating rhizobia in Kenya

George M. Mwenda\*, Graham W. O'Hara, Sofie E. De Meyer, John G. Howieson, Jason J.  
Terpolilli

Centre for Rhizobium Studies, Murdoch University, 90 South Street, Murdoch WA 6150,  
Australia

\*Corresponding author, email: [george.mwenda@murdoch.edu.au](mailto:george.mwenda@murdoch.edu.au)

**Table S1:** The geographical origin of isolates recovered from *P. vulgaris* in Kenya, their RPO1-PCR groupings, effectiveness and GenBank accession numbers of sequenced genes. Accession numbers of reference sequences from GenBank are also included.

| Isolate/Strain | Geographical origin in Kenya | Site | RPO1-PCR Group | RFLP 16S rRNA group | 16S rRNA | <i>recA</i> | <i>atpD</i> | <i>nodC</i> | Effectiveness** |
|----------------|------------------------------|------|----------------|---------------------|----------|-------------|-------------|-------------|-----------------|
| NAK 103        | Butula, Busia                | 1    | 49             | 2                   | KY921857 | MF065950    | MG288740    | MF065968    | Effective       |
| NAK 104        | Butula, Busia                | 1    | 16             | 3                   | MF623859 | MG288718    | MG288741    | MG288696    | Effective       |
| NAK 108        | Butula, Busia                | 1    | 51             | -                   | -        | -           | -           | -           | -               |
| NAK 209        | Loresho, Nairobi             | 2    | 71             | -                   | -        | -           | -           | -           | -               |
| NAK 210        | Loresho, Nairobi             | 2    | 55             | 1                   | KY921860 | MF065953    | MG288743    | MF065970    | Ineffective     |
| NAK 211        | Loresho, Nairobi             | 2    | 55             | -                   | -        | -           | -           | -           | -               |
| NAK 212        | Loresho, Nairobi             | 2    | 77             | -                   | -        | -           | -           | -           | -               |
| NAK 213        | Loresho, Nairobi             | 2    | 71             | -                   | -        | -           | -           | -           | -               |
| NAK 214        | Loresho, Nairobi             | 2    | 4              | 1                   | MF623860 | MG288719    | MG288744    | MG288697    | Effective       |
| NAK 215        | Loresho, Nairobi             | 2    | 1              | -                   | -        | -           | -           | -           | -               |
| NAK 216        | Loresho, Nairobi             | 2    | 58             | 1                   | -        | -           | -           | -           | -               |
| NAK 217        | Loresho, Nairobi             | 2    | 58             | -                   | -        | -           | -           | -           | -               |
| NAK 218        | Loresho, Nairobi             | 2    | 49             | -                   | -        | -           | -           | -           | -               |
| NAK 219        | Loresho, Nairobi             | 2    | 74             | -                   | -        | -           | -           | -           | -               |
| NAK 220        | Loresho, Nairobi             | 2    | 49             | 2                   | MF623861 | MG288720    | MG288745    | MG288698    | Effective       |
| NAK 221        | Loresho, Nairobi             | 2    | 53             | -                   | -        | -           | -           | -           | -               |
| NAK 222        | Loresho, Nairobi             | 2    | 74             | -                   | -        | -           | -           | -           | -               |
| NAK 223        | Kabete, Kiambu               | 3    | 26             | 2                   | -        | -           | -           | -           | -               |
| NAK 224        | Kabete, Kiambu               | 3    | 53             | -                   | -        | -           | -           | -           | -               |
| NAK 225        | Kabete, Kiambu               | 3    | 49             | -                   | -        | -           | -           | -           | -               |
| NAK 226        | Kabete, Kiambu               | 3    | 32             | 2                   | -        | -           | -           | -           | -               |
| NAK 227        | Kabete, Kiambu               | 3    | 56             | 1                   | MF623863 | MG288721    | MG288746    | MG288699    | Effective       |

| Isolate/Strain | Geographical origin in Kenya | Site | RPO1-PCR Group | RFLP 16S rRNA group | 16S rRNA | <i>recA</i> | <i>atpD</i> | <i>nodC</i> | Effectiveness** |
|----------------|------------------------------|------|----------------|---------------------|----------|-------------|-------------|-------------|-----------------|
| NAK 228        | Kabete, Kiambu               | 3    | 81             | 2                   | -        | -           | -           | -           | -               |
| NAK 229        | Kabete, Kiambu               | 3    | 57             | -                   | -        | -           | -           | -           | -               |
| NAK 230        | Kabete, Kiambu               | 3    | 56             | -                   | -        | -           | -           | -           | -               |
| NAK 231        | Kabete, Kiambu               | 3    | 30             | 2                   | MF623864 | MG288722    | MG288747    | MG288700    | Poor            |
| NAK 232        | Kabete, Kiambu               | 3    | 83             | 2                   | -        | -           | -           | -           | -               |
| NAK 233        | Kabete, Kiambu               | 3    | 56             | 1                   | -        | -           | -           | -           | -               |
| NAK 234        | Kabete, Kiambu               | 3    | 36             | 2                   | -        | -           | -           | -           | -               |
| NAK 235        | Kabete, Kiambu               | 3    | 57             | -                   | -        | -           | -           | -           | -               |
| NAK 237        | Kabete, Kiambu               | 3    | 74             | 1                   | -        | -           | -           | -           | -               |
| NAK 238        | Kabete, Kiambu               | 3    | 56             | -                   | -        | -           | -           | -           | -               |
| NAK 239        | Kabete, Kiambu               | 4    | 49             | 2                   | KY921861 | MF065954    | MG288748    | MF065971    | Effective       |
| NAK 240        | Kabete, Kiambu               | 4    | 49             | -                   | -        | -           | -           | -           | -               |
| NAK 241        | Kabete, Kiambu               | 4    | 49             | -                   | -        | -           | -           | -           | -               |
| NAK 242        | Kabete, Kiambu               | 4    | 49             | 2                   | MF623865 | MG288723    | MG288749    | MG288701    | Partial         |
| NAK 243        | Kabete, Kiambu               | 4    | 49             | -                   | -        | -           | -           | -           | -               |
| NAK 244        | Kabete, Kiambu               | 4    | 49             | -                   | -        | -           | -           | -           | -               |
| NAK 245        | Wangige, Kiambu              | 5    | 78             | 2                   | KY921862 | MF065955    | MG288750    | MF065972    | Partial         |
| NAK 246        | Wangige, Kiambu              | 5    | 59             | -                   | -        | -           | -           | -           | -               |
| NAK 247        | Wangige, Kiambu              | 5    | 68             | 1                   | -        | -           | -           | -           | -               |
| NAK 248        | Wangige, Kiambu              | 5    | 46             | 2                   | -        | -           | -           | -           | -               |
| NAK 249        | Wangige, Kiambu              | 5    | 79             | 2                   | -        | -           | -           | -           | -               |
| NAK 251        | Ndenderu, Kiambu             | 6    | 5              | -                   | -        | -           | -           | -           | -               |
| NAK 252        | Ndenderu, Kiambu             | 6    | 5              | 1                   | -        | -           | -           | -           | -               |
| NAK 253        | Ndenderu, Kiambu             | 6    | 84             | 1                   | -        | -           | -           | -           | -               |
| NAK 254        | Ndenderu, Kiambu             | 6    | 20             | 1                   | MF623866 | MG288724    | MG288751    | MG288702    | Effective       |

| Isolate/Strain | Geographical origin in Kenya | Site | RPO1-PCR Group | RFLP 16S rRNA group | 16S rRNA | <i>recA</i> | <i>atpD</i> | <i>nodC</i> | Effectiveness** |
|----------------|------------------------------|------|----------------|---------------------|----------|-------------|-------------|-------------|-----------------|
| NAK 255        | Ndenderu, Kiambu             | 6    | 59             | 1                   | -        | -           | -           | -           | -               |
| NAK 256        | Ndenderu, Kiambu             | 6    | 33             | 2                   | -        | -           | -           | -           | -               |
| NAK 257        | Ndenderu, Kiambu             | 6    | 62             | 1                   | -        | -           | -           | -           | -               |
| NAK 258        | Ndenderu, Kiambu             | 6    | 60             | 1                   | -        | -           | -           | -           | -               |
| NAK 259        | Ndenderu, Kiambu             | 6    | 65             | 1                   | -        | -           | -           | -           | -               |
| NAK 260        | Ndenderu, Kiambu             | 6    | 59             | -                   | -        | -           | -           | -           | -               |
| NAK 261        | Ndenderu, Kiambu             | 6    | 58             | -                   | -        | -           | -           | -           | -               |
| NAK 262        | Ndenderu, Kiambu             | 6    | 5              | -                   | -        | -           | -           | -           | -               |
| NAK 263        | Ndenderu, Kiambu             | 6    | 45             | -                   | -        | -           | -           | -           | -               |
| NAK 264        | Ndenderu, Kiambu             | 7    | 53             | -                   | -        | -           | -           | -           | -               |
| NAK 265        | Ndenderu, Kiambu             | 7    | 37             | -                   | -        | -           | -           | -           | -               |
| NAK 266        | Ndenderu, Kiambu             | 7    | 59             | 1                   | KY921863 | MF065956    | MG288752    | MF065973    | Partial         |
| NAK 267        | Ndenderu, Kiambu             | 7    | 53             | -                   | -        | -           | -           | -           | -               |
| NAK 268        | Ndenderu, Kiambu             | 7    | 58             | -                   | -        | -           | -           | -           | -               |
| NAK 269        | Ndenderu, Kiambu             | 7    | 37             | -                   | -        | -           | -           | -           | -               |
| NAK 270        | Ndenderu, Kiambu             | 7    | 39             | 1                   | -        | -           | -           | -           | -               |
| NAK 271        | Ndenderu, Kiambu             | 7    | 37             | -                   | -        | -           | -           | -           | -               |
| NAK 272        | Ndenderu, Kiambu             | 7    | 37             | -                   | -        | -           | -           | -           | -               |
| NAK 273        | Ndenderu, Kiambu             | 7    | 37             | -                   | -        | -           | -           | -           | -               |
| NAK 274        | Ndenderu, Kiambu             | 7    | 80             | -                   | -        | -           | -           | -           | -               |
| NAK 275        | Ndenderu, Kiambu             | 7    | 80             | 2                   | -        | -           | -           | -           | -               |
| NAK 276        | Ndenderu, Kiambu             | 7    | 82             | 1                   | -        | -           | -           | -           | -               |
| NAK 277        | Ndenderu, Kiambu             | 7    | 7              | 1                   | -        | -           | -           | -           | -               |
| NAK 278        | Ndenderu, Kiambu             | 7    | 37             | -                   | -        | -           | -           | -           | -               |
| NAK 279        | Ndenderu, Kiambu             | 7    | 38             | 1                   | -        | -           | -           | -           | -               |

| Isolate/Strain | Geographical origin in Kenya | Site | RPO1-PCR Group | RFLP 16S rRNA group | 16S rRNA | <i>recA</i> | <i>atpD</i> | <i>nodC</i> | Effectiveness** |
|----------------|------------------------------|------|----------------|---------------------|----------|-------------|-------------|-------------|-----------------|
| NAK 280        | Ndenderu, Kiambu             | 8    | 19             | 1                   | -        | -           | -           | -           | -               |
| NAK 281        | Ndenderu, Kiambu             | 8    | 63             | 1                   | -        | -           | -           | -           | -               |
| NAK 282        | Ndenderu, Kiambu             | 8    | 8              | 1                   | -        | -           | -           | -           | -               |
| NAK 283        | Ndenderu, Kiambu             | 8    | 8              | -                   | -        | -           | -           | -           | -               |
| NAK 284        | Ndenderu, Kiambu             | 8    | 72             | 1                   | MF623868 | MG288725    | MG288753    | MG288703    | Effective       |
| NAK 285        | Ndenderu, Kiambu             | 8    | 72             | -                   | -        | -           | -           | -           | -               |
| NAK 286        | Ndenderu, Kiambu             | 8    | 47             | -                   | -        | -           | -           | -           | -               |
| NAK 287        | Ndenderu, Kiambu             | 8    | 31             | 2                   | KY921864 | MF065957    | MG288754    | MF065974    | Effective       |
| NAK 288        | Ndenderu, Kiambu             | 8    | 48             | 1                   | MF623869 | MG288726    | MG288755    | MG288704    | Effective       |
| NAK 289        | Ndenderu, Kiambu             | 8    | 59             | -                   | -        | -           | -           | -           | -               |
| NAK 290        | Ndenderu, Kiambu             | 8    | 54             | 1                   | -        | -           | -           | -           | -               |
| NAK 291        | Ndenderu, Kiambu             | 8    | 50             | -                   | -        | -           | -           | -           | -               |
| NAK 292        | Ndenderu, Kiambu             | 8    | 74             | -                   | -        | -           | -           | -           | -               |
| NAK 293        | Ndenderu, Kiambu             | 8    | 59             | -                   | -        | -           | -           | -           | -               |
| NAK 294        | Ndenderu, Kiambu             | 8    | 50             | 4                   | KY921865 | MF065958    | MG288756    | MF065975    | Effective       |
| NAK 295        | Muchatha, Kiambu             | 9    | 45             | 1                   | MF623870 | MG288727    | MG288757    | MG288705    | Effective       |
| NAK 296        | Muchatha, Kiambu             | 9    | 59             | -                   | -        | -           | -           | -           | -               |
| NAK 297        | Muchatha, Kiambu             | 9    | 64             | 1                   | -        | -           | -           | -           | -               |
| NAK 298        | Muchatha, Kiambu             | 9    | 61             | 1                   | -        | -           | -           | -           | -               |
| NAK 299        | Muchatha, Kiambu             | 9    | 46             | 2                   | MF623871 | MG288728    | MG288758    | MG288706    | Effective       |
| NAK 300        | Muchatha, Kiambu             | 9    | 59             | -                   | -        | -           | -           | -           | -               |
| NAK 301        | Muchatha, Kiambu             | 9    | 59             | -                   | -        | -           | -           | -           | -               |
| NAK 302        | Muchatha, Kiambu             | 9    | 59             | -                   | -        | -           | -           | -           | -               |
| NAK 303        | Muchatha, Kiambu             | 9    | 6              | 1                   | -        | -           | -           | -           | -               |
| NAK 304        | Muchatha, Kiambu             | 9    | 46             | -                   | -        | -           | -           | -           | -               |

| Isolate/Strain | Geographical origin in Kenya | Site | RPO1-PCR Group | RFLP 16S rRNA group | 16S rRNA | <i>recA</i> | <i>atpD</i> | <i>nodC</i> | Effectiveness** |
|----------------|------------------------------|------|----------------|---------------------|----------|-------------|-------------|-------------|-----------------|
| NAK 305        | Muchatha, Kiambu             | 9    | 59             | -                   | -        | -           | -           | -           | -               |
| NAK 306        | Muchatha, Kiambu             | 9    | 48             | -                   | -        | -           | -           | -           | -               |
| NAK 307        | Muchatha, Kiambu             | 9    | 59             | -                   | -        | -           | -           | -           | -               |
| NAK 308        | Muchatha, Kiambu             | 9    | 28             | 1                   | -        | -           | -           | -           | -               |
| NAK 309        | Muchatha, Kiambu             | 9    | 29             | 1                   | -        | -           | -           | -           | -               |
| NAK 310        | Limuru, Kiambu               | 10   | 38             | -                   | -        | -           | -           | -           | -               |
| NAK 311        | Limuru, Kiambu               | 10   | 37             | -                   | -        | -           | -           | -           | -               |
| NAK 312        | Limuru, Kiambu               | 10   | 1              | 1                   | KY921866 | MF065959    | MG288759    | MF065976    | Partial         |
| NAK 313        | Limuru, Kiambu               | 10   | 77             | 1                   | -        | -           | -           | -           | -               |
| NAK 314        | Limuru, Kiambu               | 10   | 2              | -                   | -        | -           | -           | -           | -               |
| NAK 315        | Limuru, Kiambu               | 10   | 71             | 1                   | MF623873 | MG288729    | MG288760    | MG288707    | Partial         |
| NAK 316        | Limuru, Kiambu               | 10   | 12             | 1                   | -        | -           | -           | -           | -               |
| NAK 317        | Limuru, Kiambu               | 10   | 3              | 1                   | -        | -           | -           | -           | -               |
| NAK 318        | Limuru, Kiambu               | 10   | 63             | -                   | -        | -           | -           | -           | -               |
| NAK 319        | Limuru, Kiambu               | 10   | 46             | -                   | -        | -           | -           | -           | -               |
| NAK 320        | Limuru, Kiambu               | 10   | 12             | -                   | -        | -           | -           | -           | -               |
| NAK 321        | Limuru, Kiambu               | 10   | 37             | 1                   | MF623874 | MG288730    | MG288761    | MG288708    | Partial         |
| NAK 322        | Limuru, Kiambu               | 10   | 63             | -                   | -        | -           | -           | -           | -               |
| NAK 324        | Limuru, Kiambu               | 10   | 13             | 1                   | -        | -           | -           | -           | -               |
| NAK 325        | Limuru, Kiambu               | 10   | 73             | 1                   | -        | -           | -           | -           | -               |
| NAK 326        | Tigoni, Kiambu               | 11   | 42             | 1                   | -        | -           | -           | -           | -               |
| NAK 327        | Tigoni, Kiambu               | 11   | 24             | 1                   | MF623875 | MG288731    | MG288762    | MG288709    | Effective       |
| NAK 328        | Tigoni, Kiambu               | 11   | 42             | -                   | -        | -           | -           | -           | -               |
| NAK 329        | Tigoni, Kiambu               | 11   | 43             | 1                   | -        | -           | -           | -           | -               |
| NAK 330        | Tigoni, Kiambu               | 11   | 25             | 1                   | -        | -           | -           | -           | -               |

| Isolate/Strain | Geographical origin in Kenya | Site | RPO1-PCR Group | RFLP 16S rRNA group | 16S rRNA | <i>recA</i> | <i>atpD</i> | <i>nodC</i> | Effectiveness** |
|----------------|------------------------------|------|----------------|---------------------|----------|-------------|-------------|-------------|-----------------|
| NAK 331        | Tigoni, Kiambu               | 11   | 23             | -                   | -        | -           | -           | -           | -               |
| NAK 332        | Tigoni, Kiambu               | 11   | 21             | 1                   | MF623876 | MG288732    | MG288763    | MG288710    | Poor            |
| NAK 333        | Tigoni, Kiambu               | 11   | 21             | -                   | -        | -           | -           | -           | -               |
| NAK 334        | Tigoni, Kiambu               | 11   | 10             | 1                   | KY921867 | MF065960    | MG288764    | MF065977    | Partial         |
| NAK 335        | Tigoni, Kiambu               | 11   | 23             | -                   | -        | -           | -           | -           | -               |
| NAK 336        | Tigoni, Kiambu               | 11   | 22             | -                   | -        | -           | -           | -           | -               |
| NAK 337        | Tigoni, Kiambu               | 11   | 11             | -                   | -        | -           | -           | -           | -               |
| NAK 338        | Tigoni, Kiambu               | 11   | 27             | 1                   | -        | -           | -           | -           | -               |
| NAK 339        | Tigoni, Kiambu               | 11   | 22             | -                   | -        | -           | -           | -           | -               |
| NAK 340        | Tigoni, Kiambu               | 11   | 23             | 1                   | -        | -           | -           | -           | -               |
| NAK 341        | Tigoni, Kiambu               | 11   | 2              | -                   | -        | -           | -           | -           | -               |
| NAK 342        | Limuru, Kiambu               | 12   | 17             | -                   | -        | -           | -           | -           | -               |
| NAK 343        | Limuru, Kiambu               | 12   | 17             | 3                   | MF623877 | MG288733    | MG288765    | MG288711    | Effective       |
| NAK 344        | Limuru, Kiambu               | 12   | 17             | -                   | -        | -           | -           | -           | -               |
| NAK 345        | Limuru, Kiambu               | 12   | 34             | 1                   | -        | -           | -           | -           | -               |
| NAK 346        | Limuru, Kiambu               | 12   | 6              | -                   | -        | -           | -           | -           | -               |
| NAK 347        | Limuru, Kiambu               | 12   | 17             | -                   | -        | -           | -           | -           | -               |
| NAK 349        | Limuru, Kiambu               | 12   | 17             | 3                   | KY921868 | MF065961    | MG288766    | MF065978    | Effective       |
| NAK 350        | Kiambu                       | 13   | 76             | 2                   | -        | -           | -           | -           | -               |
| NAK 351        | Kiambu                       | 13   | 9              | 2                   | -        | -           | -           | -           | -               |
| NAK 352        | Kiambu                       | 13   | 81             | -                   | -        | -           | -           | -           | -               |
| NAK 354        | Kiambu                       | 13   | 35             | 3                   | MF623879 | MG288734    | MG288767    | MG288712    | Effective       |
| NAK 355        | Kiambu                       | 13   | 80             | -                   | -        | -           | -           | -           | -               |
| NAK 356        | Ruaka, Kiambu                | 14   | 37             | -                   | -        | -           | -           | -           | -               |
| NAK 357        | Ruaka, Kiambu                | 14   | 37             | -                   | -        | -           | -           | -           | -               |

| Isolate/Strain | Geographical origin in Kenya | Site | RPO1-PCR Group | RFLP 16S rRNA group | 16S rRNA | <i>recA</i> | <i>atpD</i> | <i>nodC</i> | Effectiveness** |
|----------------|------------------------------|------|----------------|---------------------|----------|-------------|-------------|-------------|-----------------|
| NAK 358        | Ruaka, Kiambu                | 14   | 2              | 1                   | KY921870 | MF065963    | MG288768    | MF065979    | Partial         |
| NAK 359        | Ruaka, Kiambu                | 14   | 15             | 1                   | -        | -           | -           | -           | -               |
| NAK 360        | Ruaka, Kiambu                | 14   | 44             | 2                   | -        | -           | -           | -           | -               |
| NAK 361        | Ruaka, Kiambu                | 14   | 38             | -                   | -        | -           | -           | -           | -               |
| NAK 362        | Ruaka, Kiambu                | 14   | 40             | -                   | -        | -           | -           | -           | -               |
| NAK 363        | Kinoru, Meru                 | 15   | 14             | 1                   | MF623880 | MG288735    | MG288769    | MG288713    | Effective       |
| NAK 364        | Kinoru, Meru                 | 15   | 71             | -                   | -        | -           | -           | -           | -               |
| NAK 365        | Kinoru, Meru                 | 15   | 66             | -                   | -        | -           | -           | -           | -               |
| NAK 366        | Kinoru, Meru                 | 15   | 67             | -                   | -        | -           | -           | -           | -               |
| NAK 367        | Kinoru, Meru                 | 15   | 41             | 1                   | -        | -           | -           | -           | -               |
| NAK 368        | Kinoru, Meru                 | 15   | 67             | 2                   | MF623882 | MG288736    | MG288770    | MG288714    | Partial         |
| NAK 369        | Kinoru, Meru                 | 15   | 52             | 1                   | -        | -           | -           | -           | -               |
| NAK 370        | Kinoru, Meru                 | 15   | 62             | -                   | -        | -           | -           | -           | -               |
| NAK 372        | Kinoru, Meru                 | 15   | 66             | -                   | -        | -           | -           | -           | -               |
| NAK 373        | Kinoru, Meru                 | 15   | 69             | -                   | -        | -           | -           | -           | -               |
| NAK 374        | Kinoru, Meru                 | 15   | 66             | -                   | -        | -           | -           | -           | -               |
| NAK 375        | Kinoru, Meru                 | 15   | 70             | 1                   | -        | -           | -           | -           | -               |
| NAK 376        | Kinoru, Meru                 | 15   | 66             | -                   | -        | -           | -           | -           | -               |
| NAK 377        | Kinoru, Meru                 | 15   | 66             | -                   | -        | -           | -           | -           | -               |
| NAK 378        | Kinoru, Meru                 | 15   | 66             | 2                   | MF623883 | MG288737    | MG288771    | MG288715    | Effective       |
| NAK 379        | Kinoru, Meru                 | 15   | 18             | -                   | -        | -           | -           | -           | -               |
| NAK 380        | Kinoru, Meru                 | 15   | 71             | -                   | -        | -           | -           | -           | -               |
| NAK 381        | Kinoru, Meru                 | 15   | 71             | -                   | -        | -           | -           | -           | -               |
| NAK 382        | Kinoru, Meru                 | 15   | 75             | 1                   | KY921871 | MF065964    | MG288772    | MF065980    | Partial         |
| NAK 383        | Kinoru, Meru                 | 15   | 75             | -                   | -        | -           | -           | -           | -               |



| Isolate/Strain                               | Geographical origin in Kenya | Site | RPO1-PCR Group | RFLP 16S rRNA group | 16S rRNA   | <i>recA</i> | <i>atpD</i> | <i>nodC</i> | Effectiveness** |
|----------------------------------------------|------------------------------|------|----------------|---------------------|------------|-------------|-------------|-------------|-----------------|
| NAK 385                                      | Kinoru,Meru                  | 15   | 71             | 1                   | -          | -           | -           | -           | -               |
| NAK 386                                      | Kinoru,Meru                  | 15   | 48             | -                   | -          | -           | -           | -           | -               |
| NAK 387                                      | Kinoru,Meru                  | 15   | 66             | 2                   | KY921873   | MF065966    | MG288773    | MF065981    | Partial         |
| NAK 407                                      | Sidada, Siaya                | 16   | 85             | 2                   | MF623886   | MG288738    | MG288774    | MG288716    | Effective       |
| NAK 440                                      | Sidada, Siaya                | 16   | 86             | 2                   | MF623887   | MG288739    | MG288775    | MG288717    | Poor            |
| NAK 458                                      | Sidada, Siaya                | 16   | 87             | 2                   | KY921874   | MF065967    | MG288776    | MF065982    | Effective       |
| <i>B. japonicum</i> USDA 6 <sup>T</sup>      |                              |      |                |                     | AP01220    | AM168341.1  | AM168320.1  | AP012206    |                 |
| <i>R. acidisoli</i> FH13 <sup>T</sup>        |                              |      |                |                     | KJ921033   | KJ921098.1  | KJ921069.1  | KJ921061    |                 |
| <i>R. aegyptiacum</i> 1010 <sup>T</sup>      |                              |      |                |                     | JQ670243.3 | KU664569.1  | KU664561.1  | KU664566.1  |                 |
| <i>R. alamii</i> GBV016 <sup>T</sup>         |                              |      |                |                     | AM931436.1 | -           | -           | -           |                 |
| <i>R. altiplani</i> BR 10423 <sup>T</sup>    |                              |      |                |                     | KX022634.1 | -           | -           | -           |                 |
| <i>R. anhuiense</i> CCBAU 23252 <sup>T</sup> |                              |      |                |                     | KF111868   | JQ585891.1  | JQ585863.1  | -           |                 |
| <i>R. bangladeshense</i> BLR175 <sup>T</sup> |                              |      |                |                     | JN648931.2 | JN649057.1  | JN648967.1  | -           |                 |
| <i>R. binae</i> BLR195 <sup>T</sup>          |                              |      |                |                     | JN648932.2 | JN649058.1  | JN648968.1  | -           |                 |
| <i>R. calliandrae</i> CCGE 524 <sup>T</sup>  |                              |      |                |                     | JX855162   | JX855189.1  | JX855199.1  | -           |                 |

| Isolate/Strain                                                  | Geographical origin in Kenya | Site | RPO1-PCR Group | RFLP 16S rRNA group | 16S rRNA     | <i>recA</i>    | <i>atpD</i>    | <i>nodC</i>    | Effectiveness** |
|-----------------------------------------------------------------|------------------------------|------|----------------|---------------------|--------------|----------------|----------------|----------------|-----------------|
| <i>R. ecuadorensis</i> CNPSO 671 <sup>T</sup>                   |                              |      |                |                     | LFIO01000095 | JN129351.1     | LFIO01001065.1 | LFIO01000036.1 |                 |
| <i>R. etli</i> CFN 42 <sup>T</sup> /<br>USDA 9032 <sup>T</sup>  |                              |      |                |                     | CP000133     | CP000133.1     | AJ294404.1     | U80928         |                 |
| <i>R. etli</i> CIAT 652                                         |                              |      |                |                     | -            | -              | -              | CP001076       |                 |
| <i>R. etli</i> KIM5                                             |                              |      |                |                     | -            | -              | -              | CP021125.1     |                 |
| <i>R. fabae</i> CCBAU 33202 <sup>T</sup>                        |                              |      |                |                     | DQ835306     | EF579941.1     | EF579929.1     | JN580683       |                 |
| <i>R. favelukesii</i> LPU83 <sup>T</sup>                        |                              |      |                |                     | HG916852     | -              | -              | -              |                 |
| <i>R. freirei</i> PRF 81 <sup>T</sup>                           |                              |      |                |                     | AQHN01000056 | AQHN01000010.1 | AQHN01000005   | AQHN01000086.1 |                 |
| <i>R. gallicum</i> R602sp <sup>T</sup>                          |                              |      |                |                     | ARDC01000036 | AY907357.1     | HM142762.1     | AF217266       |                 |
| <i>R. grahamii</i> CCGE 502 <sup>T</sup>                        |                              |      |                |                     | AEYE01000061 | JF424622.1     | JF424612.1     | JN021932.1     |                 |
| <i>R. hainanense</i> CCBAU 57015 <sup>T</sup> /I66 <sup>T</sup> |                              |      |                |                     | FMAC01000030 | HQ394252.1     | HQ394217.1     | -              |                 |
| <i>R. indigoferae</i> CCBAU 71042 <sup>T</sup>                  |                              |      |                |                     | NR025157.1   | -              | -              | -              |                 |
| <i>R. jaguaris</i> CCGE 525 <sup>T</sup>                        |                              |      |                |                     | JX855169     | JX855192.1     | JX855202.1     | -              |                 |
| <i>R. laguerreae</i> FB206 <sup>T</sup>                         |                              |      |                |                     | JN558651     | JN558681.2     | JN558661.1     | KC608575       |                 |

| Isolate/Strain                                                                 | Geographical origin in Kenya | Site | RPO1-PCR Group | RFLP 16S rRNA group | 16S rRNA     | <i>recA</i> | <i>atpD</i> | <i>nodC</i>    | Effectiveness** |
|--------------------------------------------------------------------------------|------------------------------|------|----------------|---------------------|--------------|-------------|-------------|----------------|-----------------|
| <i>R. leguminosarum</i> USDA 2370 <sup>T</sup>                                 |                              |      |                |                     | U29386       | AJ294376    | AJ294405.1  | FJ596038       |                 |
| <i>R. lentis</i> BLR27 <sup>T</sup>                                            |                              |      |                |                     | JN648905.2   | JN649031.1  | JN648941.1  | -              |                 |
| <i>R. leucaenae</i> USDA 9039 <sup>T</sup>                                     |                              |      |                |                     | AUFB01000074 | AJ294372    | AJ294396.1  | AUFB01000059.1 |                 |
| <i>R. loessense</i> CCBAU 7190B <sup>T</sup>                                   |                              |      |                |                     | NR115125.1   | -           | -           | -              |                 |
| <i>R. lusitanum</i> P1-7 <sup>T</sup>                                          |                              |      |                |                     | AY738130     | DQ431674    | DQ431671.1  | HM852098       |                 |
| <i>R. mayense</i> CCGE 526 <sup>T</sup>                                        |                              |      |                |                     | JX855172     | JX855195.1  | JX855205.1  | -              |                 |
| <i>R. mesoamericanum</i> CCGE 501 <sup>T</sup>                                 |                              |      |                |                     | -            | -           | -           | JN021931.1     |                 |
| <i>R. mesosinicum</i> CCBAU 25010 <sup>T</sup>                                 |                              |      |                |                     | NR043548.1   | -           | -           | -              |                 |
| <i>R. miluonense</i> HAMBI 2971 <sup>T</sup>                                   |                              |      |                |                     | jgi.1052910  | HM047131.1  | HM047116.1  | -              |                 |
| <i>R. mongolense</i> USDA 1844 <sup>T</sup>                                    |                              |      |                |                     | ATTQ01000080 | -           | -           | -              |                 |
| <i>R. multihospitium</i> HAMBI 2975 <sup>T</sup> /<br>CCBAU 83401 <sup>T</sup> |                              |      |                |                     | jgi.1052913  | EF490029    | EF490019.1  | EF050781       |                 |

| Isolate/Strain                                                   | Geographical origin in Kenya | Site | RPO1-PCR Group | RFLP 16S rRNA group | 16S rRNA     | <i>recA</i> | <i>atpD</i> | <i>nodC</i> | Effectiveness** |
|------------------------------------------------------------------|------------------------------|------|----------------|---------------------|--------------|-------------|-------------|-------------|-----------------|
| <i>R. paranaense</i> PRF 35 <sup>T</sup>                         |                              |      |                |                     | EU488753     | EU488826.1  | -           | -           |                 |
| <i>R. phaseoli</i> ATCC 14482 <sup>T</sup>                       |                              |      |                |                     | EF141340     | EF113136    | EF113151.1  | HM441255    |                 |
| <i>R. pisi</i> DSM 30132 <sup>T</sup>                            |                              |      |                |                     | AY509899     | DQ431676    | EF113149.1  | JQ795195    |                 |
| <i>R. rhizogenes</i> NBRC 13257 <sup>T</sup>                     |                              |      |                |                     | BAYX01000035 | AJ294374.1  | AJ294398.1  | -           |                 |
| <i>R. sophorae</i> CCBAU 03386 <sup>T</sup>                      |                              |      |                |                     | KJ831229     | KJ831252    | KJ831235.1  | KJ831243    |                 |
| <i>R. sophoriradicis</i> CCBAU 03470 <sup>T</sup>                |                              |      |                |                     | KJ831225     | KJ831248    | KJ831231.1  | KJ831245    |                 |
| <i>R. sullae</i> pIS 123 <sup>T</sup>                            |                              |      |                |                     | Y10170.1     | FJ816279.1  | DQ345069.1  | -           |                 |
| <i>R. tibeticum</i> CCBAU 85039 <sup>T</sup>                     |                              |      |                |                     | NR116254.1   | -           | -           | -           |                 |
| <i>R. trifolii</i> ATCC 14480 <sup>T</sup>                       |                              |      |                |                     | -            | -           | -           | FJ895269    |                 |
| <i>R. tropici</i> CIAT 899 <sup>T</sup> / USDA 9030 <sup>T</sup> |                              |      |                |                     | CPOO4015     | CP004015    | AJ294397.1  | JN580681    |                 |
| <i>R. vallis</i> CCBAU 65647 <sup>T</sup>                        |                              |      |                |                     | FJ839677     | GU211770    | GU211768.1  | GU211769    |                 |
| <i>R. yanglingense</i> SH22623 <sup>T</sup>                      |                              |      |                |                     | NR028663.1   | -           | -           | -           |                 |

| Isolate/Strain | Geographical origin in Kenya | Site | RPO1-PCR Group | RFLP 16S rRNA group | 16S rRNA | <i>recA</i> | <i>atpD</i> | <i>nodC</i> | Effectiveness** |
|----------------|------------------------------|------|----------------|---------------------|----------|-------------|-------------|-------------|-----------------|
|----------------|------------------------------|------|----------------|---------------------|----------|-------------|-------------|-------------|-----------------|

\*\* Effective ( $\geq 75\%$  of CIAT 899 SDW), partially effective (74%-50%), poorly effective (49-25%), or ineffective ( $\leq 24\%$ )

**Table S2:** Oligonucleotide primers, PCR reaction mixes and PCR cycling conditions used in this study

| Gene               | Primer sequence (5'-3')                                            | Ref | PCR reaction mix                                                                                                                                        | Cycling conditions                                                                                                                   |
|--------------------|--------------------------------------------------------------------|-----|---------------------------------------------------------------------------------------------------------------------------------------------------------|--------------------------------------------------------------------------------------------------------------------------------------|
| DNA fingerprinting | RP01: AATTTTCAAGCGTCGTGCCA                                         | (4) | 20 µL PCR: 1× PCR polymerization buffer (Fisher Biotec), 3 mM MgCl <sub>2</sub> , 1.25 µM RP01 primer, 2.5 U Taq DNA polymerase, 1 µL DNA and PCR water | 5× (94°C for 30 s, 50°C for 10 s, 72°C for 90 s); 35× (94°C for 30 s, 55°C for 25 s, 72°C for 90 s); 72°C for 5 min                  |
| 16S rRNA           | 27F: AGAGTTTGATCCTGGCTCAG<br>1492R: ACGGCTACCTGTTACGACTT           | (3) | 25 µL PCR: 1× GoTaq <sup>®</sup> Green Master Mix, 0.4 µM 27F primer, 0.4 µM 1492R primer, 2 µL DNA and PCR water                                       | 94°C for 120 s; 35× (94°C for 30 s, 55°C for 25 s, 72°C for 90 s); 72°C for 7 min                                                    |
| <i>recA</i>        | 6F: CGKCTSGTAGAGGAYAAATCGGTGGA<br>555R: CGRATCTGGTTGATGAAGATCACCAT | (2) | 25 µL PCR: 1× GoTaq <sup>®</sup> Green Master Mix, 0.4 µM 6F primer, 0.4 µM 555R primer, 2 µL DNA and PCR water                                         | 94°C for 120 s, 32× (94°C for 45 s, 60°C for 60 s, 72°C for 60 s); 72°C for 5 min                                                    |
| <i>atpD</i>        | 273F: SCTGGGSCGYATCMTGAACGT<br>771R: GCCGACACTTCCGAACCNGCCTG       | (2) | 25 µL PCR: 1× GoTaq <sup>®</sup> Green Master Mix, 0.4 µM 273F primer, 0.4 µM 771R primer, 2 µL DNA and PCR water                                       | 94°C for 120 s, 32× (94°C for 45 s, 60°C for 60 s, 72°C for 60 s); 72°C for 5 min                                                    |
| <i>nodC</i>        | 540F: TGATYGAYATGGARTAYTGGC<br>1164R: GAYARCCARTCGCTRRTTG          | (1) | 25 µL PCR: 1× GoTaq <sup>®</sup> Green Master Mix, 0.4 µM 540F primer, 0.4 µM 1164R primer, 2 µL DNA and PCR water                                      | 94°C for 120 s; 3× (94°C for 60 s, 50°C for 135 s, 72°C for 60 s); 30× (94°C for 35 s, 50°C for 75 s, 72°C for 75 s); 72°C for 7 min |

NB: K = G or T; S = G or C; R = A or G; Y = C or T; M = A or C; N = A, T, G, or C

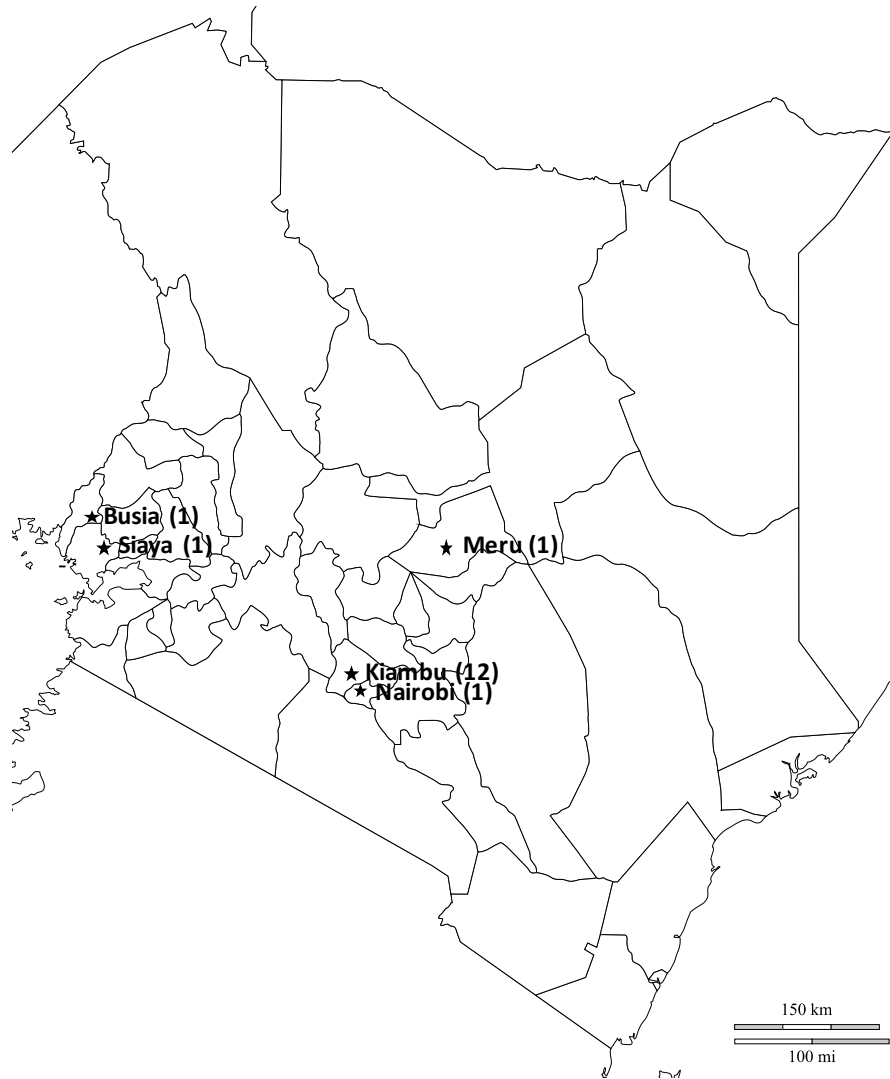

**Figure S1:** A map of Kenya showing the origin of rhizobia used in this study (number of sampling sites in each county is given in parenthesis). The generalized altitude, annual rainfall and soil types in the sampling areas are: **Busia** and **Siaya**- 1200-1500 m.a.s.l, 1200-2000 mm, acrisols and ferralsols; **Kiambu** and **Nairobi**- 1600-2000 m.a.s.l, 1200-1800 mm, humic nitisols; and **Meru**- 1700 m.a.s.l, 1500-2000 mm, cambisols.

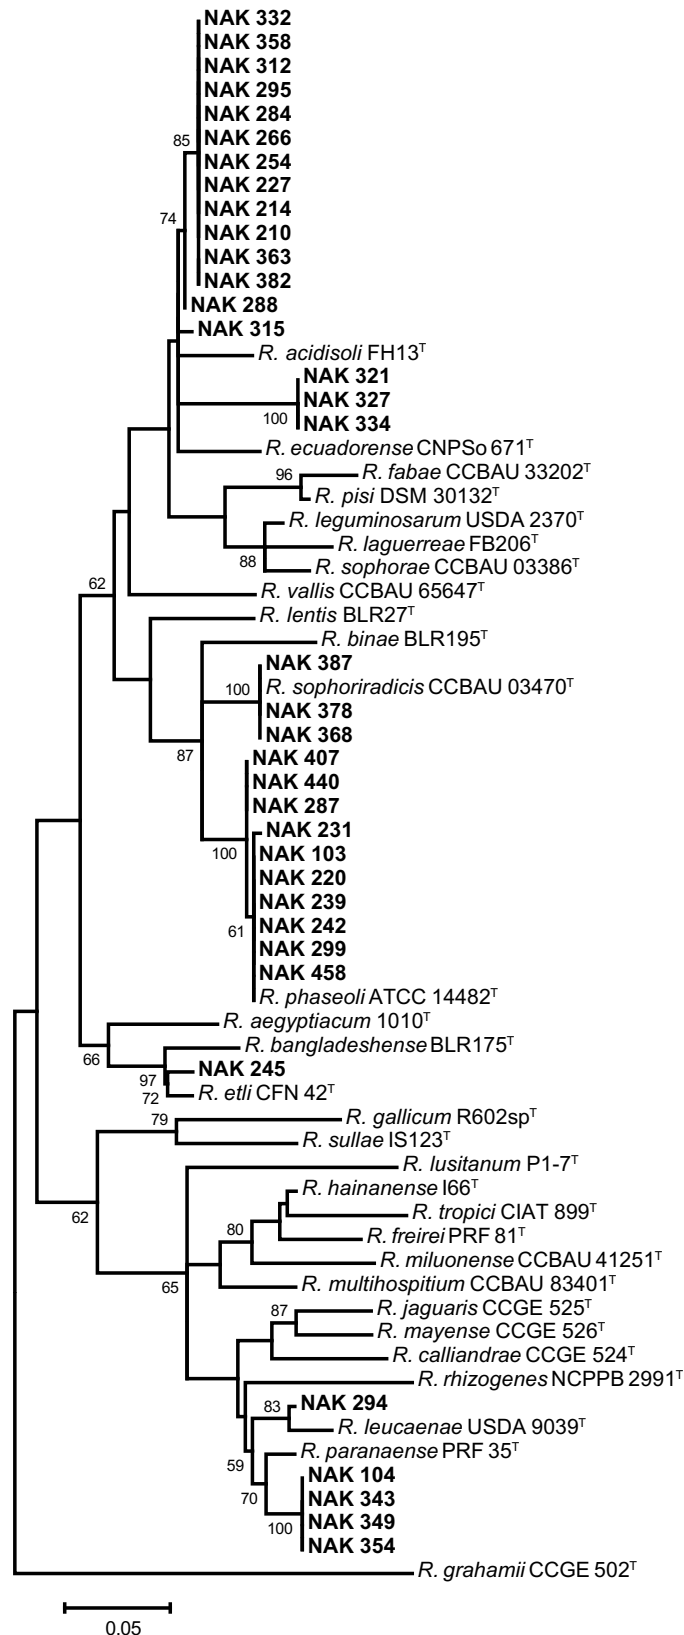

**Figure S2:** Maximum Likelihood phylogeny of the *recA* gene showing the relationship between 36 rhizobial isolates from *P. vulgaris* cultivated in Kenya (in bold) and their closest type strains. There was a total of 340 positions in the final dataset. Node supports higher than 50% are labelled with a bootstrap value (1000 replicates). Bar indicates five nucleotide substitutions per 100 nucleotides.



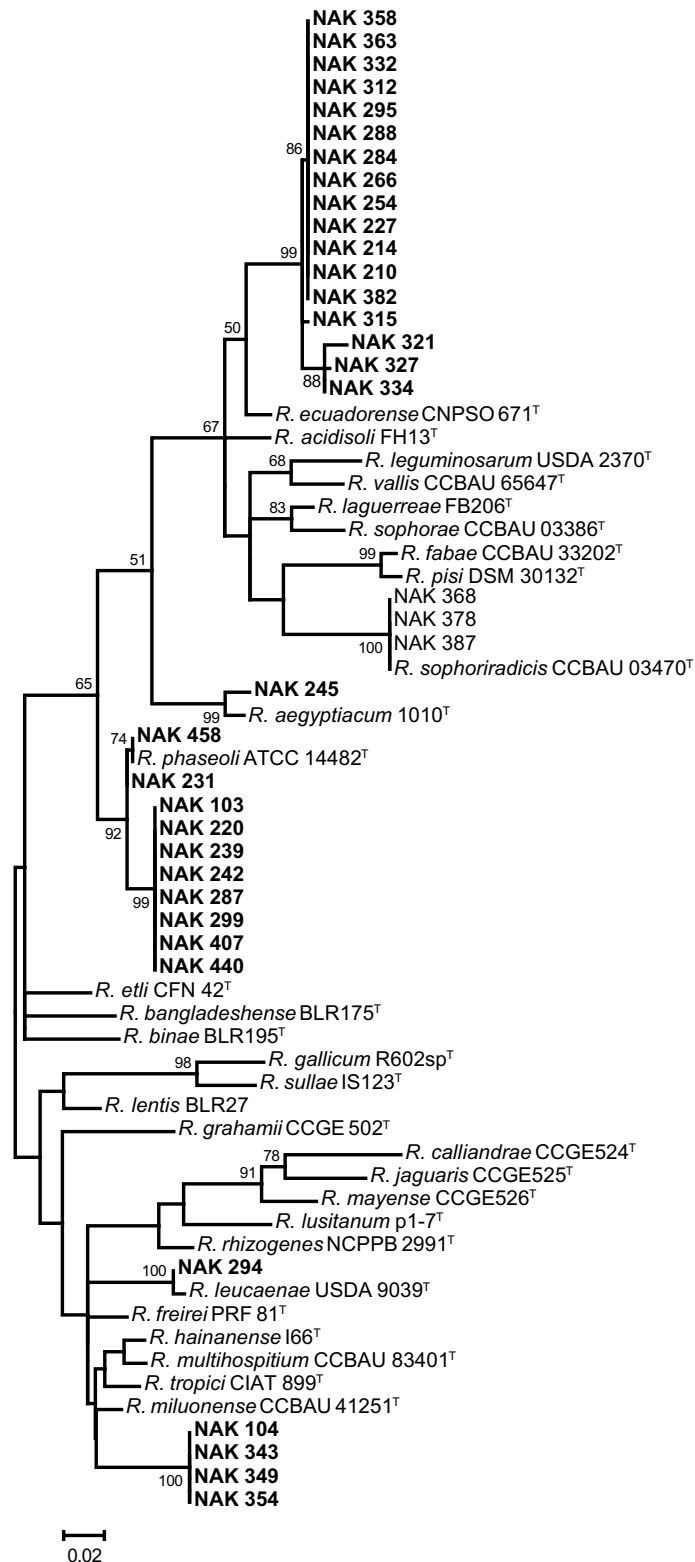

**Figure S3:** Maximum Likelihood phylogeny of the *atpD* gene showing the relationship between 36 rhizobial isolates from *P. vulgaris* cultivated in Kenya (in bold) and their closest type strains. There was a total of 396 positions in the final dataset. Node supports higher than 50% are labelled with a bootstrap value (1000 replicates). Bar indicates two nucleotide substitutions per 100 nucleotides.

### Supplementary references:

1. De Meyer SE, Van Hoorde K, Vekeman B, Braeckman T, Willems A. 2011. Genetic diversity of rhizobia associated with indigenous legumes in different regions of Flanders (Belgium). *Soil Biology and Biochemistry* 43:2384-2396.
2. Gaunt MW, Turner SL, Rigottier-Gois L, Lloyd-Macgilp SA, Young JPW. 2001. Phylogenies of *atpD* and *recA* support the small subunit rRNA-based classification of rhizobia. *International Journal of Systematic and Evolutionary Microbiology* 51:2037-2048.
3. Lane DJ. 1991. 16S/23S rRNA sequencing, p 115-147. *In* Stackebrandt E, Goodfellow M (ed), *Nucleic Acids Techniques in Bacterial Systematics*. John Wiley & Sons, Chichester.
4. Richardson AE, Viccars LA, Watson JM, Gibson AH. 1995. Differentiation of *Rhizobium* strains using the polymerase chain reaction with random and directed primers. *Soil Biology and Biochemistry* 27:515-524.
